# Supplementary material
Source: Research Square preprint supplement (doi:10.21203/rs.3.rs-8832466/v1)
Supplement: Supplementary file 1 [file 2ebe2608a99782ae8063aaa3.docx]

**Supplementary Table S3**

List of genes located within genomic regions, including an additional 0.5 Mb upstream and downstream (EquCab3.0), containing SNPs that meet the established criteria for classification as significant signals.

| ECA | Gene position (Mb) | Gene |
| --- | --- | --- |
| 3 | 107,64 - 107,8 | FAM184B (family with sequence similarity 184 member B) |
| 3 | 107,78 - 107,78 | MED28 (mediator complex subunit 28) |
| 3 | 107,79 - 107,82 | LAP3 (leucine aminopeptidase 3) |
| 3 | 107,85 - 107,86 | CLRN2 (clarin 2) |
| 3 | 107,87 - 107,88 | QDPR (quinoid dihydropteridine reductase) |
| 3 | 108,36 - 108,72 | LDB2 (LIM domain binding 2) |
| 3 | 108,96 - 109,02 | TAPT1 (transmembrane anterior posterior transformation 1) |
| 6 | 32,3 - 32,49 | PRMT8 (protein arginine methyltransferase 8) |
| 6 | 32,51 - 32,63 | CRACR2A (calcium release activated channel regulator 2A) |
| 6 | 32,68 - 32,72 | PARP11 (poly(ADP-ribose) polymerase family member 11) |
| 6 | 33,08 - 33,11 | CCND2 (cyclin D2) |
| 6 | 33,12 - 33,15 | TIGAR (TP53 induced glycolysis regulatory phosphatase) |
| 6 | 33,16 - 33,17 | FGF23 (fibroblast growth factor 23) |
| 6 | 33,2 - 33,22 | FGF6 (fibroblast growth factor 6) |
| 6 | 33,27 - 33,33 | FERRY3 (FERRY endosomal RAB5 effector complex subunit 3) |
| 6 | 33,3 - 33,33 | RAD51AP1 (RAD51 associated protein 1) |
| 6 | 33,33 - 33,39 | NDUFA9 (NADH:ubiquinone oxidoreductase subunit A9) |
| 6 | 33,39 - 33,41 | AKAP3 (A-kinase anchoring protein 3) |
| 6 | 33,41 - 33,44 | NDUFA9 (NADH:ubiquinone oxidoreductase subunit A9) |
| 6 | 33,48 - 33,55 | GALNT8 (polypeptide N-acetylgalactosaminyltransferase 8) |
| 6 | 33,56 - 33,63 | KCNA6 (potassium voltage-gated channel subfamily A member 6) |
| 6 | 33,79 - 33,8 | KCNA5 (potassium voltage-gated channel subfamily A member 5) |
| 6 | 34,13 - 34,19 | NTF3 (neurotrophin 3) |
| 6 | 34,26 - 34,59 | ANO2 (anoctamin 2) |
| 7 | 5,28 - 5,32 | ARHGEF18 (Rho/Rac guanine nucleotide exchange factor 18) |
| 7 | 5,32 - 5,34 | PEX11G (peroxisomal biosis factor 11 gamma) |
| 7 | 5,34 - 5,35 | SAXO5 (stabilizer of axonemal microtubules 5) |
| 7 | 5,35 - 5,36 | ZNF358 (zinc finger protein 358) |
| 7 | 5,36 - 5,37 | MCOLN1 (mucolipin TRP cation channel 1) |
| 7 | 5,37 - 5,39 | PNPLA6 (patatin like phospholipase domain containing 6) |
| 7 | 5,41 - 5,43 | CAMSAP3 (calmodulin regulated spectrin associated protein family member 3) |
| 7 | 5,43 - 5,44 | XAB2 (XPA binding protein 2) |
| 7 | 5,43 - 5,44 | PET100 (PET100 cytochrome c oxidase chaperone) |
| 7 | 5,44 - 5,44 | PCP2 (Purkinje cell protein 2) |
| 7 | 5,44 - 5,45 | STXBP2 (syntaxin binding protein 2) |
| 7 | 5,46 - 5,46 | RETN (resistin) |
| 7 | 5,47 - 5,47 | MCEMP1 (mast cell expressed membrane protein 1) |
| 7 | 5,47 - 5,47 | TRAPPC5 (trafficking protein particle complex subunit 5) |
| 7 | 5,47 - 5,48 | FCER2 (Fc epsilon receptor II) |
| 7 | 5,65 - 5,69 | EVI5L (ecotropic viral integration site 5 like) |
| 7 | 5,67 - 5,69 | PRR36 (proline rich 36) |
| 7 | 5,7 - 5,7 | LRRC8E (leucine rich repeat containing 8 VRAC subunit E) |
| 7 | 5,7 - 5,71 | MAP2K7 (mitogen-activated protein kinase kinase 7) |
| 7 | 5,71 - 5,72 | TGFBR3L (transforming growth factor beta receptor 3 like) |
| 7 | 5,72 - 5,72 | SNAPC2 (small nuclear RNA activating complex polypeptide 2) |
| 7 | 5,73 - 5,74 | TIMM44 (translocase of inner mitochondrial membrane 44) |
| 7 | 5,76 - 5,8 | ELAVL1 (ELAV like RNA binding protein 1) |
| 7 | 5,8 - 5,83 | CCL25 (C-C motif chemokine ligand 25) |
| 7 | 5,83 - 5,9 | FBN3 (fibrillin 3) |
| 7 | 5,97 - 6 | CERS4 (ceramide synthase 4) |
| 7 | 6,01 - 6,02 | CD320 (CD320 molecule) |
| 7 | 6,02 - 6,03 | NDUFA7 (NADH:ubiquinone oxidoreductase subunit A7) |
| 7 | 6,03 - 6,04 | KANK3 (KN motif and ankyrin repeat domains 3) |
| 7 | 6,06 - 6,07 | ANGPTL4 (angiopoietin like 4) |
| 7 | 6,11 - 6,12 | GPR83 (G protein-coupled receptor 83) |
| 7 | 6,13 - 6,2 | MRE11 (MRE11 homolog, double strand break repair nuclease) |
| 7 | 6,2 - 6,2 | ANKRD49 (ankyrin repeat domain 49) |
| 7 | 6,22 - 6,32 | PIWIL4 (piwi like RNA-mediated silencing 4) |
| 7 | 6,25 - 6,26 | FUT4 (fucosyltransferase 4) |
| 7 | 6,38 - 6,53 | AMOTL1 (angiomotin like 1) |
| 7 | 6,61 - 6,62 | CWC15 (CWC15 spliceosome associated protein homolog) |
| 7 | 6,69 - 6,73 | ENDOD1 (endonuclease domain containing 1) |
| 7 | 6,78 - 6,84 | SESN3 (sestrin 3) |
| 7 | 7,3 - 7,33 | FAM76B (family with sequence similarity 76 member B) |
| 7 | 7,33 - 7,37 | CEP57 (centrosomal protein 57) |
| 7 | 7,37 - 7,48 | MTMR2 (myotubularin related protein 2) |
| 7 | 7,51 - 7,85 | MAML2 (mastermind like transcriptional coactivator 2) |
| 7 | 7,85 - 7,88 | CCDC82 (coiled-coil domain containing 82) |
| 7 | 7,88 - 7,94 | JRKL (JRK like) |
| 20 | 35,24 - 35,37 | GRM4 (glutamate metabotropic receptor 4) |
| 20 | 35,41 - 35,42 | HMGA1 (high mobility group AT-hook 1) |
| 20 | 35,42 - 35,44 | SMIM29 (small integral membrane protein 29) |
| 20 | 35,45 - 35,56 | NUDT3 (nudix hydrolase 3) |
| 20 | 35,57 - 35,58 | RPS10 (ribosomal protein S10) |
| 20 | 35,61 - 35,66 | PACSIN1 (protein kinase C and casein kinase substrate in neurons 1) |
| 20 | 35,66 - 35,68 | SPDEF (SAM pointed domain containing ETS transcription factor) |
| 20 | 35,68 - 35,81 | ILRUN (inflammation and lipid regulator with UBA-like and NBR1-like domains) |
| 20 | 35,84 - 35,86 | SNRPC (small nuclear ribonucleoprotein polypeptide C) |
| 20 | 35,87 - 35,94 | BLTP3A (bridge-like lipid transfer protein family member 3A) |
| 20 | 35,93 - 35,95 | TAF11 (TATA-box binding protein associated factor 11) |
| 20 | 35,95 - 36,19 | ANKS1A (ankyrin repeat and sterile alpha motif domain containing 1A) |
| 20 | 36,15 - 36,17 | TCP11 (t-complex 11) |
| 20 | 36,24 - 36,27 | SCUBE3 (signal peptide, CUB domain and EGF like domain containing 3) |
| 20 | 36,3 - 36,31 | ZNF76 (zinc finger protein 76) |
| 20 | 36,31 - 36,33 | DEF6 (DEF6 guanine nucleotide exchange factor) |
| 20 | 36,34 - 36,41 | PPARD (peroxisome proliferator activated receptor delta) |
| 20 | 36,43 - 36,44 | FANCE (FA complementation group E) |
| 20 | 36,44 - 36,45 | RPL10A (ribosomal protein L10a) |
| 20 | 36,45 - 36,49 | TULP1 (TUB like protein 1) |
| 20 | 36,55 - 36,65 | FKBP5 (FKBP prolyl isomerase 5) |
| 20 | 36,67 - 36,69 | ARMC12 (armadillo repeat containing 12) |
| 20 | 36,71 - 36,71 | CLPSL2 (colipase like 2) |
| 20 | 36,72 - 36,73 | CLPS (colipase) |
| 20 | 36,74 - 36,75 | LHFPL5 (LHFPL tetraspan subfamily member 5) |
| 20 | 36,75 - 36,85 | SRPK1 (SRSF protein kinase 1) |
| 20 | 36,86 - 36,93 | SLC26A8 (solute carrier family 26 member 8) |
| 20 | 36,92 - 37 | MAPK14 (mitogen-activated protein kinase 14) |
| 20 | 37,02 - 37,03 | MAPK13 (mitogen-activated protein kinase 13) |
| 20 | 37,08 - 37,12 | BRPF3 (bromodomain and PHD finger containing 3) |
| 20 | 37,15 - 37,21 | PNPLA1 (patatin like phospholipase domain containing 1) |
| 20 | 37,2 - 37,21 | BNIP5 (BCL2 interacting protein 5) |
| 20 | 37,22 - 37,26 | ETV7 (ETS variant transcription factor 7) |
| 20 | 37,26 - 37,3 | PXT1 (peroxisomal testis enriched protein 1) |
| 20 | 37,3 - 37,34 | KCTD20 (potassium channel tetramerization domain containing 20) |
| 20 | 37,33 - 37,37 | STK38 (serine/threonine kinase 38) |
| 20 | 37,4 - 37,41 | SRSF3 (serine and arginine rich splicing factor 3) |
| 20 | 37,46 - 37,47 | CDKN1A (cyclin dependent kinase inhibitor 1A) |
| 20 | 37,48 - 37,53 | RAB44 (RAB44, member RAS onco family) |
| 20 | 37,52 - 37,61 | CPNE5 (copine 5) |
| 20 | 37,62 - 37,64 | PPIL1 (peptidylprolyl isomerase like 1) |
| 20 | 37,62 - 37,68 | C20H6orf89 (chromosome 20 C6orf89 homolog) |
| 20 | 37,7 - 37,7 | PI16 (peptidase inhibitor 16) |
| 20 | 37,71 - 37,73 | MTCH1 (mitochondrial carrier 1) |
| 20 | 37,73 - 37,77 | FGD2 (FYVE, RhoGEF and PH domain containing 2) |
| 20 | 37,87 - 37,87 | PIM1 (Pim-1 proto-onco, serine/threonine kinase) |
| 20 | 37,89 - 37,93 | TMEM217B (transmembrane protein 217B) |
| 20 | 37,9 - 37,93 | TMEM217 (transmembrane protein 217) |
| 20 | 37,93 - 38 | TBC1D22B (TBC1 domain family member 22B) |
| 20 | 38,01 - 38,05 | RNF8 (ring finger protein 8) |
| 20 | 38,09 - 38,14 | CMTR1 (cap methyltransferase 1) |
| 20 | 38,14 - 38,16 | CCDC167 (coiled-coil domain containing 167) |
| 20 | 38,28 - 38,35 | MDGA1 (MAM domain containing glycosylphosphatidylinositol anchor 1) |
| 20 | 38,44 - 38,75 | ZFAND3 (zinc finger AN1-type containing 3) |
| 20 | 38,77 - 39,15 | BTBD9 (BTB domain containing 9) |
| 20 | 39,16 - 39,2 | GLO1 (glyoxalase I) |
| 20 | 39,2 - 39,49 | DNAH8 (dynein axonemal heavy chain 8) |
| 20 | 49,63 - 49,69 | TFAP2D (transcription factor AP-2 delta) |
| 20 | 49,72 - 49,75 | TFAP2B (transcription factor AP-2 beta) |
| 20 | 50,37 - 50,79 | PKHD1 (PKHD1 ciliary IPT domain containing fibrocystin/polyductin) |
| 20 | 50,88 - 50,88 | IL17A (interleukin 17A) |
| 20 | 50,92 - 50,94 | IL17F (interleukin 17F) |
| 20 | 50,95 - 50,98 | MCM3 (minichromosome maintenance complex component 3) |
| 20 | 51,02 - 51,09 | PAQR8 (progestin and adipoQ receptor family member 8) |
| 20 | 51,09 - 51,2 | EFHC1 (EF-hand domain containing 1) |
| 20 | 51,17 - 51,25 | TRAM2 (translocation associated membrane protein 2) |
| 20 | 51,32 - 51,34 | TMEM14A (transmembrane protein 14A) |
| 20 | 51,57 - 51,58 | GSTA3 (glutathione S-transferase alpha 3) |
| 20 | 51,71 - 51,73 | GSTA4 (glutathione S-transferase alpha 4) |
| 20 | 51,73 - 51,78 | CILK1 (ciliosis associated kinase 1) |
| 20 | 51,79 - 51,81 | FBXO9 (F-box protein 9) |
| 20 | 51,83 - 51,86 | GCM1 (glial cells missing transcription factor 1) |
| 20 | 51,92 - 52 | ELOVL5 (ELOVL fatty acid elongase 5) |
| 20 | 52,1 - 52,14 | GCLC (glutamate-cysteine ligase catalytic subunit) |
| 20 | 52,23 - 52,39 | KLHL31 (kelch like family member 31) |
| 20 | 52,39 - 52,53 | LRRC1 (leucine rich repeat containing 1) |
| 20 | 52,59 - 52,84 | MLIP (muscular LMNA interacting protein) |
| 20 | 52,85 - 52,88 | TINAG (tubulointerstitial nephritis antigen) |
| 20 | 53,29 - 53,37 | FAM83B (family with sequence similarity 83 member B) |
| 20 | 53,53 - 53,64 | HCRTR2 (hypocretin receptor 2) |
| 20 | 53,64 - 53,73 | GFRAL (GDNF family receptor alpha like) |
| 20 | 53,76 - 53,9 | HMGCLL1 (3-hydroxy-3-methylglutaryl-CoA lyase like 1) |
| 20 | 53,99 - 54,21 | BMP5 (bone morphotic protein 5) |
| 20 | 54,29 - 54,47 | COL21A1 (collagen type XXI alpha 1 chain) |
| 20 | 54,65 - 55,09 | DST (dystonin) |
| 20 | 55,09 - 55,15 | BEND6 (BEN domain containing 6) |
| 20 | 55,16 - 55,17 | KIAA1586 (KIAA1586) |
| 20 | 55,21 - 55,3 | ZNF451 (zinc finger protein 451) |
| 20 | 55,3 - 55,33 | RAB23 (RAB23, member RAS onco family) |
| 20 | 55,33 - 56,04 | PRIM2 (DNA primase subunit 2) |
| 20 | 56,23 - 56,78 | KHDRBS2 (KH RNA binding domain containing, signal transduction associated 2) |
| 20 | 57,53 - 57,65 | LGSN (lengsin, lens protein with glutamine synthetase domain) |
| 20 | 57,71 - 57,72 | PTP4A1 (protein tyrosine phosphatase 4A1) |
| 20 | 57,76 - 57,89 | PHF3 (PHD finger protein 3) |
| 20 | 57,84 - 59,42 | EYS (eyes shut homolog) |
| 24 | 43,18 - 43,21 | RTL1 (retrotransposon Gag like 1) |
| 24 | 43,8 - 43,8 | DIO3 (iodothyronine deiodinase 3) |
| 24 | 43,97 - 44,11 | PPP2R5C (protein phosphatase 2 regulatory subunit B'gamma) |
| 24 | 44,14 - 44,21 | DYNC1H1 (dynein cytoplasmic 1 heavy chain 1) |
| 24 | 44,23 - 44,24 | HSP90AA1 (heat shock protein 90 alpha family class A member 1) |
| 24 | 44,28 - 44,35 | WDR20 (WD repeat domain 20) |
| 24 | 44,33 - 44,42 | MOK (MOK protein kinase) |
| 24 | 44,43 - 44,47 | ZNF839 (zinc finger protein 839) |
| 24 | 44,46 - 44,48 | CINP (cyclin dependent kinase 2 interacting protein) |
| 24 | 44,48 - 44,58 | TECPR2 (tectonin beta-propeller repeat containing 2) |
| 24 | 44,65 - 44,77 | RCOR1 (REST corepressor 1) |
| 24 | 44,82 - 44,93 | TRAF3 (TNF receptor associated factor 3) |
| 24 | 44,94 - 44,95 | AMN (amnion associated transmembrane protein) |
| 24 | 44,95 - 45,08 | CDC42BPB (CDC42 binding protein kinase beta) |
| 24 | 45,12 - 45,12 | EXOC3L4 (exocyst complex component 3 like 4) |
| 24 | 45,14 - 45,15 | TNFAIP2 (TNF alpha induced protein 2) |
| 24 | 45,29 - 45,29 | EIF5 (eukaryotic translation initiation factor 5) |
| 24 | 45,32 - 45,43 | MARK3 (microtubule affinity regulating kinase 3) |
| 24 | 45,44 - 45,44 | CKB (creatine kinase B) |
| 24 | 45,44 - 45,45 | TRMT61A (tRNA methyltransferase 61A) |
| 24 | 45,47 - 45,49 | BAG5 (BAG cochaperone 5) |
| 24 | 45,48 - 45,52 | COA8 (cytochrome c oxidase assembly factor 8) |
| 29 | 13,1 - 13,81 | KIAA1217 (KIAA1217) |
| 29 | 13,96 - 14,01 | OTUD1 (OTU deubiquitinase 1) |
| 29 | 14,07 - 14,22 | C29H10orf67 (chromosome 29 C10orf67 homolog) |
| 29 | 14,23 - 14,23 | PTF1A (pancreas associated transcription factor 1a) |
| 29 | 14,3 - 14,32 | MSRB2 (methionine sulfoxide reductase B2) |
| 29 | 14,37 - 14,46 | ARMC3 (armadillo repeat containing 3) |
| 29 | 14,61 - 14,77 | PIP4K2A (phosphatidylinositol-5-phosphate 4-kinase type 2 alpha) |
| 29 | 14,84 - 14,94 | SPAG6 (sperm associated antigen 6) |
| 29 | 14,95 - 14,96 | BMI1 (BMI1 proto-oncogene, polycomb ring finger) |
| 29 | 14,96 - 14,96 | COMMD3 (COMM domain containing 3) |
| 29 | 15,2 - 15,39 | DNAJC1 (DnaJ heat shock protein family (Hsp40) member C1) |
| 29 | 15,38 - 15,66 | MLLT10 (MLLT10 histone lysine methyltransferase DOT1L cofactor) |
| 29 | 15,68 - 15,68 | SKIDA1 (SKI/DACH domain containing 1) |
| 29 | 15,93 - 16,26 | NEBL (nebulette) |
| 29 | 16,59 - 17,02 | PLXDC2 (plexin domain containing 2) |

ECA, Equus caballus chromosome.
