# Supplementary material
Source: Research Square preprint supplement (doi:10.21203/rs.3.rs-8832466/v1)
Supplement: Supplementary file 2 [file 32db77165aff0a3d57947080.docx]

**Supplementary Table S4**

SNP-based heritability on the observed scale, adjusted for sex and first six principal components.

| **Level** | **h²** | **SE** |
| --- | --- | --- |
| Fetlock and/or hock and/or stifle osteochondrosis (Supplementary Figure S2) | | |
| A | 0.261693 | 0.119127 |
| B | 0.270807 | 0.168427 |
| Hock osteochondrosis (Supplementary Figure S4) | | |
| A | 0.538934 | 0.111869 |
| B | 0.610393 | 0.162314 |
| C | 0.574666 | 0.214874 |
| Osteochondrosis of the distal intermediate ridge of the tibia (Supplementary Figure S6) | | |
| A | 0.494256 | 0.115749 |
| B | 0.528203 | 0.121297 |
| C | 0.495463 | 0.178875 |
| D | 0.611628 | 0.223871 |
| Stifle osteochondrosis (Supplementary Figure S8) | | |
| A | 0.142211 | 0.102317 |
| B | 0.136358 | 0.170579 |
| C | 0.015067 | 0.237158 |
| Fetlock osteochondrosis (Supplementary Figure S10) | | |
| A | 0.136736 | 0.117138 |
| B | 0.115756 | 0.178990 |
| C | 0.000001 | 0.248099 |
| Palmaro-/plantaroproximal osteochondral fragments of the proximal phalanx (Supplementary Figure S12) | | |
| A | 0.256762 | 0.111823 |
| B | 0.548314 | 0.139928 |
| C | 0.281062 | 0.167193 |
| D | 0.100226 | 0.226760 |
| Dorsoproximal osteochondral fragments of the proximal phalanx (Supplementary Figure S14) | | |
| A | 0.056774 | 0.102097 |
| B | 0.158039 | 0.137414 |
| C | 0.296217 | 0.173973 |
| D | 0.396324 | 0.277538 |

h², Observed heritability; Level, Specifies the strictness level applied to the basis phenotype definition, as detailed in the corresponding figure; SE, Standard error.
