# Supplementary material
Source: Research Square preprint supplement (doi:10.21203/rs.3.rs-8832466/v1)
Supplement: Supplementary file 4 [file 57701bd7728462b16ac51f11.docx]

**Supplementary Table S1**

Distribution of horses by studbook and sex.

| **Studbook** | **Male** | **Female** | **Total** |
| --- | --- | --- | --- |
| Anglo European | 9 | 5 | 14 |
| Belgian Warmblood | 287 | 139 | 426 |
| English Thoroughbred | 1 | 0 | 1 |
| Hannoveraner Verband | 9 | 0 | 9 |
| Holsteiner Verband | 8 | 3 | 11 |
| Irish Sport Horse | 1 | 0 | 1 |
| Royal Dutch Sport Horse | 29 | 14 | 43 |
| Oldenburg Verband | 7 | 4 | 11 |
| Rhenish Warmblood | 0 | 1 | 1 |
| Belgian Sport Horse | 18 | 9 | 27 |
| Selle Français | 12 | 12 | 24 |
| Westfalen Verband | 5 | 1 | 6 |
| Zangersheide | 84 | 105 | 189 |
| **Total** | 470 | 293 | 763 |
