# Supplementary material
Source: Research Square preprint supplement (doi:10.21203/rs.3.rs-8832466/v1)
Supplement: Supplementary file 5 [file 57892380eb33a115e90cbbf7.docx]

**Supplementary Figure S1**


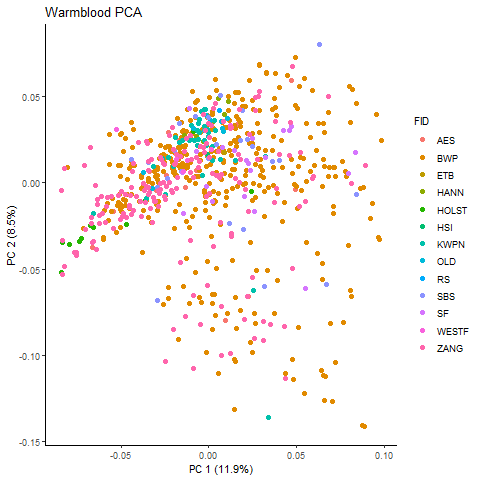

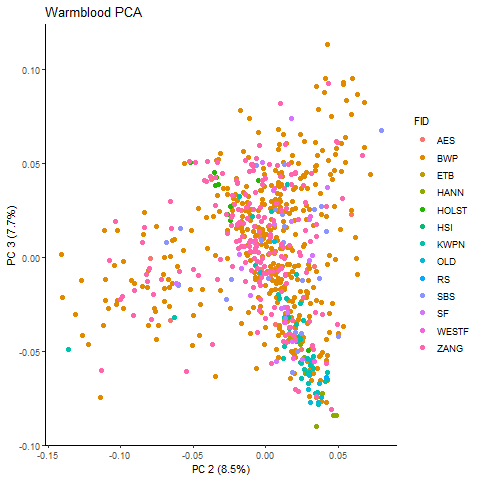

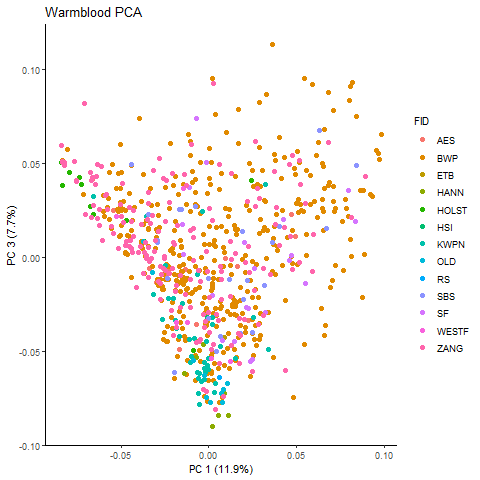


Principal component analysis. AES, Anglo European Warmblood horse; BWP, Belgian Warmblood horse; ETB, English Thoroughbred horse, HANN, Hanoverian horse; HOLST, Holsteiner horse; HSI, Irish Sport horse; KWPN, Royal Dutch Sport horse; OLD, Oldenburg horse; RS, Rheinlander horse; SBS, Belgian Sport horse; SF, Selle Français horse; WESTF, Westfalen horse; ZANG, Zangersheide horse.
