# Supplementary material
Source: Research Square preprint supplement (doi:10.21203/rs.3.rs-8832466/v1)
Supplement: Supplementary file 6 [file 8f680e4c155271d0f14a483e.docx]

**Supplementary Table S2**

Genome-wide (suggestive) results at the Bonferroni-corrected significance threshold of 1 (P < -log10(1/177 029)) derived from the linear regression case/control genome-wide association analyses. Markers in bold indicate a genome-wide significant association between the effect allele and the disease phenotype at the stricter Bonferroni-corrected significance of 0.05
(P < -log10(0.05/177 029)). The basis phenotype definition is provided at the top of each table (shaded in grey), with the corresponding figure, which contains more detailed information on this phenotype definition, indicated in parentheses. The ‘Level’ column specifies the strictness level applied to the basis phenotype definition, as detailed in the corresponding figure.

| **ECA** | **Position (bp)** | **-log10(P)** | **Level** | **SNP-ID** | **A1** | **A2** | **N** | **AF1** | **Beta** | **SE** |
| --- | --- | --- | --- | --- | --- | --- | --- | --- | --- | --- |
| Fetlock and/or hock and/or stifle osteochondrosis (Supplementary Figure S2) | | | | | | | | | | |
| 2 | 86,470,352 | 5.31 | B | AX-103479212 | G | T | 410 | 0.46 | 0.15 | 0.03 |
| 3 | 108,278,183 | 5.4 | A | AX-103842381 | T | C | 631 | 0.25 | -0.15 | 0.03 |
| **3** | **108,408,729** | **6.77** | A | AX-103309475 | G | T | 632 | 0.35 | -0.15 | 0.03 |
| 3 | 108,495,788 | 5.6 | A | AX-103438195 | A | G | 632 | 0.24 | -0.15 | 0.03 |
| 4 | 84,307,802 | 5.58 | B | AX-104791282 | C | T | 410 | 0.01 | 0.65 | 0.14 |
| 31 | 4,948,736 | 5.26 | B | AX-104649536 | A | G | 410 | 0.32 | 0.17 | 0.04 |
| Hock osteochondrosis (Supplementary Figure S4) | | | | | | | | | | |
| 2 | 86,012,184 | 5.33 | C | AX-104200971 | T | G | 318 | 0.49 | 0.15 | 0.03 |
| 3 | 89,594,453 | 5.68 | A | AX-104668102 | A | C | 662 | 0.10 | 0.19 | 0.04 |
| 3 | 107,641,233 | 5.34 | A | AX-104376260 | A | G | 665 | 0.29 | -0.13 | 0.03 |
| 10 | 6,381,104 | 5.29 | B | AX-104158818 | T | C | 445 | 0.16 | 0.18 | 0.04 |
| 10 | 31,843,904 | 5.94 | C | AX-104081968 | G | A | 318 | 0.24 | -0.18 | 0.04 |
| 20 | 35,577,858 | 5.34 | A | AX-104332547 | T | C | 665 | 0.06 | 0.24 | 0.05 |
| **20** | **35,577,858** | **7.28** | B | AX-104332547 | T | C | 446 | 0.06 | 0.33 | 0.06 |
| 20 | 35,577,858 | 6.04 | C | AX-104332547 | T | C | 318 | 0.05 | 0.36 | 0.07 |
| 20 | 36,116,573 | 5.67 | B | AX-103009827 | A | G | 446 | 0.09 | 0.25 | 0.05 |
| 20 | 36,130,940 | 5.7 | B | AX-104725207 | G | A | 446 | 0.10 | 0.22 | 0.05 |
| **20** | **38,870,106** | **6.68** | B | AX-104735560 | T | C | 443 | 0.30 | -0.17 | 0.03 |
| **24** | **43,661,482** | **6.87** | A | AX-104142937 | G | A | 664 | 0.02 | 0.42 | 0.08 |
| 24 | 43,661,482 | 6.35 | B | AX-104142937 | G | A | 445 | 0.02 | 0.46 | 0.09 |
| 24 | 44,607,142 | 5.44 | A | AX-104927441 | C | T | 665 | 0.02 | 0.38 | 0.08 |
| 24 | 45,030,203 | 5.43 | A | AX-104814671 | G | A | 665 | 0.02 | 0.46 | 0.10 |
| **24** | **45,030,203** | **6.89** | B | AX-104814671 | G | A | 446 | 0.02 | 0.59 | 0.11 |
| 25 | 36,831,565 | 5.82 | C | AX-104937539 | C | T | 318 | 0.02 | 0.64 | 0.13 |
| 27 | 15,503,243 | 5.65 | A | AX-104654052 | G | A | 664 | 0.42 | -0.11 | 0.02 |
| 29 | 14,031,191 | 5.52 | B | AX-104118426 | G | T | 446 | 0.04 | 0.37 | 0.08 |
| 29 | 16,561,967 | 5.26 | C | AX-102997943 | C | T | 318 | 0.02 | 0.60 | 0.13 |
| Osteochondrosis of the distal intermediate ridge of the tibia (Supplementary Figure S6) | | | | | | | | | | |
| 1 | 34,585,104 | 6.16 | A | AX-103938446 | C | T | 669 | 0.01 | 0.58 | 0.12 |
| 1 | 34,585,104 | 6 | B | AX-103938446 | C | T | 624 | 0.01 | 0.59 | 0.12 |
| 1 | 59,286,045 | 5.33 | A | AX-104285410 | T | C | 665 | 0.05 | 0.22 | 0.05 |
| 2 | 86,762,781 | 5.53 | D | AX-103036094 | T | C | 302 | 0.27 | 0.18 | 0.04 |
| 4 | 84,307,802 | 5.98 | D | AX-104791282 | C | T | 302 | 0.01 | 0.86 | 0.18 |
| 10 | 26,348,126 | 5.32 | D | AX-103362541 | G | A | 302 | 0.47 | -0.14 | 0.03 |
| 10 | 31,843,904 | 6.03 | D | AX-104081968 | G | A | 302 | 0.24 | -0.18 | 0.04 |
| 11 | 46,603,126 | 5.89 | D | AX-103089341 | G | T | 302 | 0.06 | 0.33 | 0.07 |
| 17 | 72,130,310 | 6.01 | B | AX-103717055 | A | G | 623 | 0.05 | 0.26 | 0.05 |
| 17 | 72,130,310 | 6.04 | C | AX-103717055 | A | G | 424 | 0.05 | 0.32 | 0.06 |
| **17** | **72,130,310** | **6.81** | D | AX-103717055 | A | G | 302 | 0.05 | 0.35 | 0.07 |
| 21 | 53,453,889 | 5.52 | C | AX-103997789 | C | T | 425 | 0.02 | 0.46 | 0.10 |
| 23 | 38,118,439 | 5.44 | C | AX-104379849 | G | T | 425 | 0.02 | 0.53 | 0.12 |
| 23 | 38,298,595 | 5.29 | B | AX-103031502 | A | G | 624 | 0.01 | 0.46 | 0.10 |
| 23 | 38,298,595 | 5.84 | C | AX-103031502 | A | G | 425 | 0.02 | 0.53 | 0.11 |
| 24 | 45,030,203 | 5.37 | C | AX-104814671 | G | A | 425 | 0.01 | 0.57 | 0.12 |
| 29 | 14,031,191 | 5.43 | A | AX-104118426 | G | T | 668 | 0.04 | 0.28 | 0.06 |
| **29** | **14,031,191** | **6.85** | B | AX-104118426 | G | T | 623 | 0.04 | 0.32 | 0.06 |
| **29** | **14,031,191** | **7.24** | C | AX-104118426 | G | T | 425 | 0.04 | 0.40 | 0.07 |
| 29 | 14,031,191 | 5.93 | D | AX-104118426 | G | T | 302 | 0.04 | 0.42 | 0.09 |
| 29 | 15,393,990 | 5.87 | A | AX-104805040 | G | A | 668 | 0.02 | 0.41 | 0.08 |
| 29 | 15,393,990 | 5.93 | B | AX-104805040 | G | A | 623 | 0.02 | 0.41 | 0.08 |
| 29 | 15,393,990 | 5.82 | C | AX-104805040 | G | A | 424 | 0.02 | 0.50 | 0.10 |
| 29 | 16,561,967 | 5.78 | D | AX-102997943 | C | T | 302 | 0.01 | 0.63 | 0.13 |
| Stifle osteochondrosis (Supplementary Figure S8) | | | | | | | | | | |
| 1 | 141,922,314 | 5.6 | A | AX-104584289 | C | T | 697 | 0.02 | 0.35 | 0.07 |
| 1 | 142,457,518 | 6.53 | A | AX-103674096 | T | C | 695 | 0.01 | 0.41 | 0.08 |
| 7 | 93,469,242 | 6.29 | C | AX-104944860 | T | C | 264 | 0.02 | 0.53 | 0.10 |
| 8 | 71,293,683 | 5.85 | C | AX-103460645 | G | A | 263 | 0.01 | 0.47 | 0.10 |
| 9 | 80,207,666 | 5.3 | C | AX-104652750 | G | A | 264 | 0.11 | 0.19 | 0.04 |
| 10 | 35,663,646 | 5.54 | C | AX-104740662 | G | T | 262 | 0.43 | 0.12 | 0.03 |
| 10 | 38,827,461 | 5.9 | B | AX-103632653 | G | T | 376 | 0.46 | 0.12 | 0.02 |
| 12 | 16,923,217 | 5.86 | C | AX-104874277 | A | C | 264 | 0.02 | 0.45 | 0.09 |
| 14 | 82,742,401 | 5.47 | A | AX-103861286 | G | A | 697 | 0.02 | 0.36 | 0.08 |
| 29 | 21,639,067 | 5.48 | A | AX-103352736 | C | A | 696 | 0.02 | 0.31 | 0.07 |
| **30** | **27,772,825** | **6.87** | C | AX-104706533 | G | A | 264 | 0.01 | 0.69 | 0.13 |
| 31 | 20,008,875 | 5.76 | B | AX-103449705 | G | A | 359 | 0.02 | 0.42 | 0.09 |
| Fetlock osteochondrosis (Supplementary Figure S10) | | | | | | | | | | |
| 1 | 43,452,320 | 6.36 | C | AX-103797922 | C | T | 249 | 0.03 | 0.26 | 0.05 |
| 2 | 16,287,524 | 5.79 | C | AX-103910914 | T | C | 249 | 0.02 | 0.30 | 0.06 |
| 2 | 17,211,598 | 5.35 | B | AX-103325001 | A | G | 347 | 0.01 | 0.48 | 0.11 |
| 2 | 112,389,337 | 5.52 | C | AX-103942469 | A | G | 249 | 0.11 | 0.14 | 0.03 |
| 3 | 102,062,347 | 5.4 | C | AX-104704657 | G | T | 247 | 0.04 | 0.24 | 0.05 |
| 5 | 54,583,935 | 5.96 | C | AX-103080241 | C | T | 249 | 0.01 | 0.39 | 0.08 |
| 6 | 60,059,928 | 6.08 | B | AX-104954489 | C | T | 343 | 0.01 | 0.37 | 0.07 |
| 6 | 62,749,702 | 5.34 | C | AX-103814702 | C | T | 247 | 0.12 | 0.14 | 0.03 |
| 7 | 22,348,119 | 5.61 | B | AX-104808662 | A | G | 347 | 0.03 | 0.25 | 0.05 |
| 7 | 55,913,930 | 5.84 | C | AX-104071247 | C | T | 249 | 0.01 | 0.39 | 0.08 |
| 9 | 27,502,580 | 5.61 | C | AX-103560743 | T | C | 249 | 0.03 | 0.25 | 0.05 |
| 10 | 54,501,692 | 5.3 | A | AX-104407039 | C | T | 570 | 0.05 | 0.17 | 0.04 |
| 11 | 49,380,268 | 5.26 | B | AX-103170907 | A | C | 347 | 0.15 | 0.11 | 0.03 |
| 12 | 36,120,791 | 6.39 | B | AX-103859189 | A | G | 346 | 0.07 | 0.17 | 0.03 |
| 15 | 3,250,479 | 6.02 | B | AX-103920591 | T | C | 347 | 0.01 | 0.39 | 0.08 |
| 15 | 62,676,225 | 5.73 | A | AX-104693072 | G | A | 587 | 0.03 | 0.23 | 0.05 |
| **17** | **13,300,085** | **6.74** | C | AX-103088276 | C | T | 249 | 0.01 | 0.45 | 0.09 |
| 17 | 18,427,953 | 5.79 | B | AX-103691180 | G | T | 346 | 0.04 | 0.21 | 0.04 |
| 19 | 19,571,732 | 5.8 | C | AX-104566321 | C | T | 249 | 0.01 | 0.39 | 0.08 |
| 19 | 48,366,342 | 6.14 | C | AX-103080311 | T | C | 248 | 0.01 | 0.40 | 0.08 |
| 19 | 53,512,673 | 6.54 | C | AX-104773456 | A | G | 248 | 0.02 | 0.33 | 0.06 |
| 20 | 30,667,515 | 5.66 | C | AX-103568207 | C | T | 249 | 0.03 | 0.25 | 0.05 |
| 20 | 32,160,756 | 5.35 | C | AX-103413834 | C | G | 249 | 0.01 | 0.37 | 0.08 |
| 21 | 608,436 | 6.23 | C | AX-104860743 | A | C | 249 | 0.02 | 0.31 | 0.06 |
| **22** | **7,111,275** | **7.33** | C | AX-103080142 | C | A | 249 | 0.01 | 0.47 | 0.09 |
| 22 | 8,234,970 | 6.07 | C | AX-104791991 | A | G | 249 | 0.01 | 0.40 | 0.08 |
| **22** | **8,380,129** | **8.83** | C | AX-104057264 | C | A | 249 | 0.02 | 0.42 | 0.07 |
| 22 | 12,008,841 | 6.17 | C | AX-103635333 | G | A | 249 | 0.01 | 0.40 | 0.08 |
| 23 | 31,593,543 | 5.38 | C | AX-104300428 | A | C | 248 | 0.05 | 0.20 | 0.04 |
| 24 | 44,083,538 | 5.36 | C | AX-103591981 | G | A | 249 | 0.00 | 0.97 | 0.21 |
| **27** | **21,426,883** | **8.51** | A | AX-104288362 | T | C | 586 | 0.33 | 0.10 | 0.02 |
| Palmaro-/plantaroproximal osteochondral fragments of the proximal phalanx  (Supplementary Figure S12) | | | | | | | | | | |
| **1** | **42,958,503** | **6.62** | D | AX-104279908 | G | A | 255 | 0.03 | 0.34 | 0.07 |
| 2 | 83,840,473 | 6.04 | B | AX-104247154 | G | A | 525 | 0.01 | 0.43 | 0.09 |
| **2** | **83,840,473** | **7.83** | D | AX-104247154 | G | A | 250 | 0.01 | 0.53 | 0.09 |
| 3 | 103,517,165 | 5.87 | C | AX-102950630 | A | G | 433 | 0.02 | 0.33 | 0.07 |
| 3 | 106,027,313 | 5.37 | D | AX-103058508 | A | G | 255 | 0.01 | 0.52 | 0.11 |
| **4** | **84,307,802** | **7.24** | D | AX-104791282 | C | T | 255 | 0.00 | 0.94 | 0.17 |
| 5 | 90,147,748 | 6.46 | B | AX-104778553 | A | C | 533 | 0.10 | 0.14 | 0.03 |
| 5 | 90,147,748 | 5.95 | C | AX-104778553 | A | C | 434 | 0.09 | 0.15 | 0.03 |
| **5** | **90,366,029** | **9.45** | D | AX-104529410 | A | C | 255 | 0.01 | 0.68 | 0.11 |
| 5 | 91,686,027 | 5.7 | B | AX-103556007 | T | C | 532 | 0.04 | 0.21 | 0.04 |
| 5 | 91,686,027 | 5.81 | C | AX-103556007 | T | C | 434 | 0.04 | 0.23 | 0.05 |
| 6 | 15,641,501 | 5.26 | D | AX-104855106 | G | A | 255 | 0.02 | 0.41 | 0.09 |
| **6** | **32,936,384** | **6.62** | B | AX-103229585 | T | C | 532 | 0.02 | 0.36 | 0.07 |
| 6 | 33,077,683 | 6.03 | B | AX-103702952 | T | C | 532 | 0.02 | 0.33 | 0.07 |
| 6 | 33,091,200 | 6.17 | B | AX-103972927 | A | G | 531 | 0.18 | 0.11 | 0.02 |
| 6 | 33,111,523 | 5.62 | B | AX-104044969 | C | T | 532 | 0.11 | 0.12 | 0.03 |
| 6 | 33,235,130 | 6.14 | B | AX-104592153 | T | C | 533 | 0.02 | 0.33 | 0.07 |
| 6 | 33,553,886 | 5.39 | B | AX-104283994 | C | T | 533 | 0.11 | 0.13 | 0.03 |
| 6 | 33,922,654 | 5.54 | B | AX-103088381 | G | A | 532 | 0.21 | 0.10 | 0.02 |
| 7 | 5,799,885 | 5.38 | B | AX-103065017 | C | T | 533 | 0.01 | 0.34 | 0.07 |
| 7 | 7,992,079 | 5.79 | A | AX-104184080 | C | A | 695 | 0.06 | 0.16 | 0.03 |
| 7 | 7,992,079 | 6.3 | B | AX-104184080 | C | A | 533 | 0.07 | 0.17 | 0.03 |
| **7** | **8,032,154** | **6.7** | A | AX-104620847 | A | G | 694 | 0.01 | 0.38 | 0.07 |
| 7 | 48,397,038 | 5.76 | D | AX-103667908 | G | A | 255 | 0.01 | 0.53 | 0.11 |
| 8 | 28,738,462 | 6.47 | D | AX-103877082 | C | T | 255 | 0.00 | 0.89 | 0.17 |
| 8 | 72,576,883 | 5.27 | B | AX-103495611 | A | C | 532 | 0.09 | 0.13 | 0.03 |
| 9 | 28,374,013 | 5.38 | B | AX-104979241 | T | G | 533 | 0.02 | 0.30 | 0.07 |
| 9 | 79,709,135 | 6.24 | B | AX-104274737 | G | T | 533 | 0.02 | 0.26 | 0.05 |
| **10** | **21,146,459** | **6.98** | B | AX-103484615 | C | T | 533 | 0.02 | 0.36 | 0.07 |
| 10 | 21,146,459 | 6.48 | C | AX-103484615 | C | T | 434 | 0.02 | 0.39 | 0.08 |
| 10 | 80,315,169 | 5.99 | C | AX-104136956 | C | T | 433 | 0.01 | 0.49 | 0.10 |
| **10** | **82,642,249** | **7.82** | C | AX-103632302 | C | T | 433 | 0.01 | 0.60 | 0.11 |
| 13 | 18,624,684 | 5.32 | B | AX-104777441 | T | C | 533 | 0.04 | 0.20 | 0.04 |
| 14 | 21,387,642 | 5.64 | D | AX-104685947 | C | T | 254 | 0.02 | 0.42 | 0.09 |
| **14** | **54,173,663** | **7.97** | B | AX-104389466 | T | C | 532 | 0.05 | 0.20 | 0.04 |
| 15 | 43,962,840 | 5.4 | B | AX-102999776 | G | A | 530 | 0.01 | 0.40 | 0.09 |
| **15** | **43,962,840** | **6.8** | C | AX-102999776 | G | A | 432 | 0.01 | 0.52 | 0.10 |
| 15 | 85,984,810 | 5.45 | D | AX-103250817 | G | A | 255 | 0.03 | 0.28 | 0.06 |
| 17 | 78,304,560 | 5.91 | D | AX-104449997 | T | G | 254 | 0.01 | 0.46 | 0.09 |
| 18 | 11,579,579 | 5.41 | B | AX-103247597 | G | T | 532 | 0.01 | 0.34 | 0.07 |
| 18 | 11,579,579 | 5.58 | C | AX-103247597 | G | T | 433 | 0.01 | 0.42 | 0.09 |
| **18** | **11,579,579** | **7.27** | D | AX-103247597 | G | T | 254 | 0.01 | 0.67 | 0.12 |
| 18 | 47,491,391 | 5.37 | B | AX-103291584 | C | T | 531 | 0.02 | 0.28 | 0.06 |
| 18 | 47,491,391 | 5.9 | C | AX-103291584 | C | T | 432 | 0.02 | 0.33 | 0.07 |
| **19** | **5,740,326** | **6.95** | D | AX-104878911 | C | T | 255 | 0.01 | 0.66 | 0.12 |
| 19 | 12,400,733 | 6.06 | A | AX-104226536 | C | A | 694 | 0.01 | 0.35 | 0.07 |
| **19** | **12,400,733** | **7.02** | B | AX-104226536 | C | A | 532 | 0.01 | 0.39 | 0.07 |
| 20 | 50,180,595 | 5.37 | B | AX-104413667 | T | C | 533 | 0.02 | 0.32 | 0.07 |
| 20 | 51,051,803 | 5.5 | B | AX-103919539 | T | C | 533 | 0.03 | 0.24 | 0.05 |
| 20 | 51,211,205 | 5.71 | B | AX-103968645 | C | T | 532 | 0.02 | 0.27 | 0.06 |
| 20 | 52,515,443 | 6.51 | B | AX-103023630 | C | A | 533 | 0.02 | 0.30 | 0.06 |
| 20 | 53,719,790 | 5.65 | B | AX-104854481 | A | G | 533 | 0.02 | 0.33 | 0.07 |
| 20 | 55,647,164 | 5.77 | B | AX-104407227 | T | C | 532 | 0.01 | 0.34 | 0.07 |
| **20** | **56,253,111** | **8.52** | B | AX-104806850 | A | C | 532 | 0.02 | 0.39 | 0.07 |
| **20** | **56,253,111** | **7.04** | C | AX-104806850 | A | C | 434 | 0.01 | 0.42 | 0.08 |
| **20** | **56,360,945** | **7.93** | B | AX-103724822 | C | T | 533 | 0.02 | 0.36 | 0.06 |
| 20 | 56,360,945 | 6.39 | C | AX-103724822 | C | T | 434 | 0.02 | 0.38 | 0.08 |
| 20 | 56,366,612 | 6.45 | B | AX-103611977 | G | T | 532 | 0.04 | 0.23 | 0.05 |
| **20** | **56,524,409** | **6.93** | A | AX-104610072 | G | A | 695 | 0.01 | 0.36 | 0.07 |
| **20** | **56,751,412** | **6.81** | B | AX-103211403 | T | C | 532 | 0.02 | 0.29 | 0.05 |
| **20** | **57,546,766** | **7.98** | B | AX-103888646 | C | T | 533 | 0.01 | 0.41 | 0.07 |
| 20 | 57,546,766 | 5.98 | C | AX-103888646 | C | T | 434 | 0.01 | 0.42 | 0.09 |
| 20 | 57,941,884 | 6.42 | B | AX-103566908 | G | A | 530 | 0.01 | 0.38 | 0.07 |
| 20 | 59,085,119 | 6.27 | B | AX-103061390 | T | G | 533 | 0.01 | 0.37 | 0.07 |
| **20** | **60,744,257** | **6.99** | B | AX-104623618 | T | G | 533 | 0.01 | 0.41 | 0.08 |
| **20** | **60,960,483** | **6.99** | B | AX-103504787 | G | A | 533 | 0.01 | 0.41 | 0.08 |
| 21 | 34,464,497 | 5.52 | A | AX-103922875 | C | A | 695 | 0.08 | 0.14 | 0.03 |
| **23** | **49,179,416** | **7.25** | C | AX-103487829 | G | A | 432 | 0.01 | 0.68 | 0.12 |
| 24 | 37,965,930 | 5.75 | C | AX-104696806 | C | T | 434 | 0.03 | 0.26 | 0.06 |
| 24 | 43,506,513 | 5.71 | C | AX-105008638 | C | T | 434 | 0.03 | 0.28 | 0.06 |
| 24 | 43,661,482 | 5.73 | B | AX-104142937 | G | A | 532 | 0.02 | 0.26 | 0.05 |
| **24** | **43,661,482** | **7.38** | C | AX-104142937 | G | A | 433 | 0.02 | 0.34 | 0.06 |
| 24 | 44,083,538 | 6.55 | A | AX-103591981 | G | A | 694 | 0.02 | 0.32 | 0.06 |
| **24** | **44,083,538** | **10.12** | B | AX-103591981 | G | A | 532 | 0.01 | 0.43 | 0.07 |
| **24** | **44,083,538** | **13.26** | C | AX-103591981 | G | A | 433 | 0.01 | 0.55 | 0.07 |
| 24 | 44,232,965 | 5.53 | C | AX-104602205 | C | A | 434 | 0.08 | 0.16 | 0.03 |
| 24 | 44,237,042 | 5.35 | B | AX-103162425 | G | A | 532 | 0.03 | 0.22 | 0.05 |
| **24** | **44,237,042** | **7.25** | C | AX-103162425 | G | A | 434 | 0.03 | 0.28 | 0.05 |
| 24 | 44,445,056 | 5.89 | A | AX-103419889 | G | A | 695 | 0.02 | 0.29 | 0.06 |
| **24** | **44,445,056** | **8.83** | B | AX-103419889 | G | A | 533 | 0.01 | 0.38 | 0.06 |
| **24** | **44,445,056** | **11.23** | C | AX-103419889 | G | A | 434 | 0.01 | 0.47 | 0.07 |
| **24** | **44,607,142** | **7.59** | B | AX-104927441 | C | T | 533 | 0.02 | 0.31 | 0.06 |
| **24** | **44,607,142** | **9.26** | C | AX-104927441 | C | T | 434 | 0.02 | 0.38 | 0.06 |
| 24 | 46,410,243 | 5.45 | C | AX-103239689 | A | C | 431 | 0.02 | 0.32 | 0.07 |
| 25 | 21,352,641 | 5.81 | C | AX-103073786 | C | T | 433 | 0.19 | 0.11 | 0.02 |
| **25** | **30,635,755** | **7.27** | B | AX-104918520 | G | A | 533 | 0.02 | 0.36 | 0.07 |
| **25** | **30,635,755** | **8.56** | C | AX-104918520 | G | A | 434 | 0.02 | 0.42 | 0.07 |
| 25 | 31,115,631 | 5.77 | B | AX-104383591 | T | G | 533 | 0.03 | 0.23 | 0.05 |
| **25** | **31,115,631** | **8.63** | C | AX-104383591 | T | G | 434 | 0.03 | 0.33 | 0.05 |
| 28 | 29,320,786 | 6.05 | D | AX-104556535 | G | T | 253 | 0.01 | 0.55 | 0.11 |
| 30 | 27,772,825 | 6.47 | D | AX-104706533 | G | A | 255 | 0.01 | 0.63 | 0.12 |
| 31 | 20,498,776 | 6.53 | D | AX-102966238 | G | T | 254 | 0.04 | 0.29 | 0.06 |
| Dorsoproximal osteochondral fragments of the proximal phalanx (Supplementary Figure S14) | | | | | | | | | | |
| 1 | 89,309,197 | 5.74 | D | AX-104931345 | T | C | 259 | 0.01 | 0.54 | 0.11 |
| 1 | 100,542,927 | 5.65 | C | AX-103410177 | C | T | 436 | 0.15 | 0.13 | 0.03 |
| 1 | 159,250,568 | 5.52 | C | AX-103066535 | T | C | 436 | 0.05 | 0.22 | 0.05 |
| 1 | 170,670,696 | 5.43 | D | AX-104854908 | G | A | 256 | 0.05 | 0.23 | 0.05 |
| 1 | 170,857,773 | 5.34 | D | AX-102982860 | T | C | 260 | 0.05 | 0.23 | 0.05 |
| 2 | 97,827,987 | 5.48 | D | AX-103668975 | T | C | 260 | 0.01 | 0.53 | 0.11 |
| 3 | 10,710,031 | 6.26 | D | AX-103417980 | G | A | 260 | 0.01 | 0.56 | 0.11 |
| 3 | 11,432,598 | 5.72 | A | AX-103900771 | C | A | 689 | 0.06 | 0.19 | 0.04 |
| 4 | 34,243,396 | 5.49 | D | AX-102954736 | C | T | 260 | 0.01 | 0.49 | 0.10 |
| 4 | 82,193,108 | 6.24 | D | AX-103067607 | C | T | 253 | 0.05 | 0.26 | 0.05 |
| 6 | 7,715,795 | 5.64 | B | AX-104930470 | C | T | 549 | 0.28 | 0.10 | 0.02 |
| 6 | 7,715,795 | 5.32 | C | AX-104930470 | C | T | 435 | 0.27 | 0.10 | 0.02 |
| 6 | 82,988,399 | 5.38 | D | AX-104344345 | A | G | 260 | 0.01 | 0.48 | 0.10 |
| 9 | 70,542,684 | 6.39 | A | AX-103644685 | C | T | 685 | 0.01 | 0.45 | 0.09 |
| 9 | 70,542,684 | 6.27 | B | AX-103644685 | C | T | 546 | 0.01 | 0.50 | 0.10 |
| 9 | 70,542,684 | 5.35 | C | AX-103644685 | C | T | 433 | 0.01 | 0.50 | 0.11 |
| 10 | 2,028,571 | 6.35 | B | AX-104429637 | C | T | 550 | 0.02 | 0.34 | 0.07 |
| **10** | **2,028,571** | **8.94** | C | AX-104429637 | C | T | 436 | 0.02 | 0.46 | 0.08 |
| **10** | **2,028,571** | **7.27** | D | AX-104429637 | C | T | 260 | 0.02 | 0.53 | 0.10 |
| 10 | 7,016,102 | 5.77 | B | AX-105001793 | G | A | 551 | 0.02 | 0.34 | 0.07 |
| 10 | 20,232,681 | 5.51 | D | AX-104401746 | A | G | 259 | 0.09 | 0.19 | 0.04 |
| 12 | 25,948,579 | 5.69 | C | AX-103210810 | A | G | 434 | 0.35 | 0.10 | 0.02 |
| **15** | **7,604,290** | **8.49** | D | AX-104011233 | T | C | 259 | 0.01 | 0.71 | 0.12 |
| **18** | **68,953,869** | **7.58** | C | AX-103192882 | G | T | 436 | 0.01 | 0.60 | 0.11 |
| 18 | 68,953,869 | 5.5 | D | AX-103192882 | G | T | 260 | 0.00 | 0.90 | 0.19 |
| 20 | 40,532,731 | 6.51 | D | AX-103123186 | G | T | 260 | 0.02 | 0.41 | 0.08 |
| 22 | 33,391,077 | 6.02 | C | AX-103156085 | T | C | 436 | 0.18 | 0.12 | 0.02 |
| 23 | 43,799,533 | 5.79 | D | AX-102986537 | T | C | 260 | 0.01 | 0.66 | 0.14 |
| 25 | 32,278,672 | 6.34 | D | AX-103151507 | C | T | 260 | 0.04 | 0.29 | 0.06 |

ECA, Equus caballus chromosome; Bp, Base pair; SNP-ID, Affymetrix single nucleotide polymorphism identifier; A1, Effect allele associated with the trait; A2, Alternative allele at the SNP position; N, Number of horses used to estimate the SNP effect; AF1, Frequency of the effect allele in the sample population; Beta, Estimated SNP effect size associated with the effect allele; SE, Standard error of the effect size estimate
